# Supplementary material for: Common SNPs in FTO Gene Are Associated with Obesity Related Anthropometric Traits in an Island Population from the Eastern Adriatic Coast of Croatia
Source: PubMed Central journal article supplement (PMC2860984; doi:10.1371/journal.pone.0010375), 2010-04-28
Supplement: pone.0010375.s001.pdf [file pone.0010375.s001.pdf]

Table S1. Pairwise correlation of anthropometric measures

|     | Ht     | Wt     | BMI    | WC     | HC     | WHR    | UAC   | UAW    | BiS    | TrS    | SbS    | SpS    | AbS    |
|-----|--------|--------|--------|--------|--------|--------|-------|--------|--------|--------|--------|--------|--------|
| Ht  | 1.000  | 0.605  | -0.025 | 0.297  | 0.026  | 0.375  | 0.206 | 0.545  | -0.264 | -0.468 | -0.014 | -0.030 | -0.086 |
| Wt  | 0.605  | 1.000  | 0.776  | 0.823  | 0.647  | 0.503  | 0.721 | 0.648  | 0.085  | -0.057 | 0.441  | 0.360  | 0.362  |
| BMI | -0.025 | 0.776  | 1.000  | 0.804  | 0.807  | 0.328  | 0.746 | 0.387  | 0.317  | 0.299  | 0.558  | 0.478  | 0.522  |
| WC  | 0.297  | 0.823  | 0.804  | 1.000  | 0.676  | 0.721  | 0.678 | 0.509  | 0.034  | -0.018 | 0.451  | 0.354  | 0.438  |
| HC  | 0.026  | 0.647  | 0.807  | 0.676  | 1.000  | -0.019 | 0.623 | 0.283  | 0.307  | 0.347  | 0.453  | 0.404  | 0.482  |
| WHR | 0.375  | 0.503  | 0.328  | 0.721  | -0.019 | 1.000  | 0.340 | 0.430  | -0.242 | -0.350 | 0.188  | 0.101  | 0.142  |
| UAC | 0.206  | 0.721  | 0.746  | 0.678  | 0.623  | 0.340  | 1.000 | 0.471  | 0.260  | 0.286  | 0.491  | 0.441  | 0.506  |
| UAW | 0.545  | 0.648  | 0.387  | 0.509  | 0.283  | 0.430  | 0.471 | 1.000  | 0.045  | -0.202 | 0.293  | 0.170  | 0.113  |
| BiS | -0.264 | 0.085  | 0.317  | 0.034  | 0.307  | -0.242 | 0.260 | 0.045  | 1.000  | 0.652  | 0.531  | 0.456  | 0.382  |
| TrS | -0.468 | -0.057 | 0.299  | -0.018 | 0.347  | -0.350 | 0.286 | -0.202 | 0.652  | 1.000  | 0.417  | 0.471  | 0.457  |
| SbS | -0.014 | 0.441  | 0.558  | 0.451  | 0.453  | 0.188  | 0.491 | 0.293  | 0.531  | 0.417  | 1.000  | 0.606  | 0.533  |
| SpS | -0.030 | 0.360  | 0.478  | 0.354  | 0.404  | 0.101  | 0.441 | 0.170  | 0.456  | 0.471  | 0.606  | 1.000  | 0.716  |
| AbS | -0.086 | 0.362  | 0.522  | 0.438  | 0.482  | 0.142  | 0.506 | 0.113  | 0.382  | 0.457  | 0.533  | 0.716  | 1.000  |
