# Supplementary material for: Common SNPs in FTO Gene Are Associated with Obesity Related Anthropometric Traits in an Island Population from the Eastern Adriatic Coast of Croatia
Source: PubMed Central journal article supplement (PMC2860984; doi:10.1371/journal.pone.0010375), 2010-04-28
Supplement: pone.0010375.s003.pdf [file pone.0010375.s003.pdf]

Table S3. Principle components of “body fatness” phenotypic measures

| Component | Variance % | Variable loadings |        |        |        |        |               |
|-----------|------------|-------------------|--------|--------|--------|--------|---------------|
|           |            | UAW               | Wt     | HC     | WC     | BMI    | UAC           |
| PC1       | 72.96%     | -0.264            | -0.452 | -0.427 | -0.425 | -0.447 | -0.403        |
| PC2       | 13.01%     | <b>0.935</b>      | -0.011 | -0.140 | -0.276 | -0.171 | 0.028         |
| PC3       | 5.98%      | 0.131             | 0.204  | 0.382  | 0.154  | -0.003 | <b>-0.878</b> |
