# Supplementary material for: Common SNPs in FTO Gene Are Associated with Obesity Related Anthropometric Traits in an Island Population from the Eastern Adriatic Coast of Croatia
Source: PLoS One. 2010 Apr 28;5(4):e10375. doi: 10.1371/journal.pone.0010375 (PMC2860984; doi:10.1371/journal.pone.0010375)
Supplement: Table S2 — Permutation test results between SNP markers and anthropometric traits. (0.16 MB PDF) [file pone.0010375.s002.pdf]

Table S2. Permutation test results between SNP markers and anthropometric traits

| No | rs id      | Pos <sup>‡</sup> | Alleles <sup>§</sup> | MAF   | Permutation <i>P</i> -value of single-locus association test (1df test under additive model)* |        |              |                                           |               |                |               |        |                                           |       |       |       |       |
|----|------------|------------------|----------------------|-------|-----------------------------------------------------------------------------------------------|--------|--------------|-------------------------------------------|---------------|----------------|---------------|--------|-------------------------------------------|-------|-------|-------|-------|
|    |            |                  |                      |       | Outliers                                                                                      |        |              | Body fatness measures and UAC (Cluster 1) |               |                |               |        | Subcutaneous obesity measures (Cluster 2) |       |       |       |       |
|    |            |                  |                      |       | Ht                                                                                            | WHR    | UAW          | Wt                                        | HC            | WC             | BMI           | UAC    | SbS                                       | SpS   | AbS   | BiS   | TrS   |
| 1  | rs1861869  | 52347682         | CG                   | 0.450 | 0.904                                                                                         | 0.813  | 0.0792       | 0.236                                     | 0.685         | 0.262          | 0.594         | 0.344  | 0.862                                     | 0.856 | 0.912 | 1     | 0.962 |
| 2  | rs1077128  | 52349154         | GT                   | 0.208 | 1                                                                                             | 1      | 0.595        | 0.867                                     | 0.974         | 0.996          | 0.9           | 0.658  | 0.147                                     | 0.804 | 0.775 | 0.998 | 1     |
| 3  | rs11643744 | 52349299         | AG                   | 0.280 | 0.973                                                                                         | 0.79   | 0.977        | 0.904                                     | 0.996         | 0.728          | 0.999         | 0.968  | 1                                         | 0.997 | 0.999 | 1     | 0.939 |
| 4  | rs7186521  | 52350423         | GA                   | 0.496 | 0.862                                                                                         | 1      | 0.0971       | 0.213                                     | 0.484         | 0.532          | 0.613         | 0.211  | 0.771                                     | 0.74  | 0.869 | 1     | 0.998 |
| 5  | rs13334933 | 52353137         | AG                   | 0.195 | 0.989                                                                                         | 1      | 0.251        | 0.577                                     | 0.837         | 0.986          | 0.773         | 0.766  | 0.387                                     | 0.98  | 0.829 | 0.997 | 1     |
| 6  | rs16952517 | 52354558         | GA                   | 0.134 | 1                                                                                             | 0.906  | <b>0.027</b> | 0.995                                     | 0.947         | 1              | 0.981         | 1      | 1                                         | 1     | 1     | 1     | 1     |
| 7  | rs6499643  | 52355019         | TC                   | 0.152 | 0.802                                                                                         | 1      | 1            | 0.999                                     | 0.997         | 1              | 1             | 1      | 0.999                                     | 1     | 1     | 0.998 | 1     |
| 8  | rs4784323  | 52355066         | GA                   | 0.307 | 1                                                                                             | 0.94   | 0.912        | 0.946                                     | 0.971         | 0.807          | 0.851         | 0.142  | 0.985                                     | 1     | 1     | 1     | 0.997 |
| 9  | rs7206790  | 52355409         | GC                   | 0.469 | 1                                                                                             | 0.0536 | 0.235        | 0.107                                     | 0.612         | <b>0.0154</b>  | 0.0981        | 0.117  | 0.105                                     | 0.794 | 0.985 | 1     | 0.317 |
| 10 | rs9939973  | 52358069         | GA                   | 0.493 | 0.996                                                                                         | 0.355  | 0.115        | <b>0.04</b>                               | 0.189         | <b>0.0149</b>  | 0.0745        | 0.137  | 0.435                                     | 0.942 | 0.694 | 1     | 0.275 |
| 11 | rs1421085  | 52358455         | TC                   | 0.465 | 1                                                                                             | 0.82   | 0.105        | <b>0.0224</b>                             | <b>0.0172</b> | <b>0.00728</b> | <b>0.0177</b> | 0.206  | 0.446                                     | 0.996 | 0.969 | 1     | 0.257 |
| 12 | rs10852521 | 52362466         | CT                   | 0.450 | 1                                                                                             | 0.289  | 0.246        | 0.257                                     | 0.556         | 0.0537         | 0.224         | 0.087  | 0.173                                     | 0.907 | 0.999 | 1     | 0.494 |
| 13 | rs11075986 | 52362845         | CG                   | 0.088 | 1                                                                                             | 1      | 0.999        | 0.574                                     | 0.453         | 0.956          | 0.605         | 1      | 1                                         | 1     | 0.969 | 1     | 0.999 |
| 14 | rs16952522 | 52364999         | CG                   | 0.057 | 0.585                                                                                         | 0.989  | 0.928        | 0.973                                     | 0.896         | 0.661          | 0.271         | 0.313  | 0.268                                     | 0.984 | 0.629 | 0.99  | 0.171 |
| 15 | rs17817288 | 52365265         | GA                   | 0.455 | 1                                                                                             | 0.168  | 0.088        | 0.237                                     | 0.462         | <b>0.0274</b>  | 0.217         | 0.113  | 0.0968                                    | 0.741 | 0.981 | 1     | 0.568 |
| 16 | rs1121980  | 52366748         | CT                   | 0.470 | 1                                                                                             | 0.793  | 0.0606       | <b>0.0179</b>                             | <b>0.0361</b> | <b>0.011</b>   | <b>0.0223</b> | 0.227  | 0.475                                     | 0.952 | 0.86  | 1     | 0.209 |
| 17 | rs16945088 | 52370025         | AG                   | 0.075 | 1                                                                                             | 0.962  | 0.909        | 0.828                                     | 0.393         | 0.997          | 0.86          | 1      | 1                                         | 1     | 1     | 1     | 1     |
| 18 | rs17817449 | 52370868         | TG                   | 0.437 | 0.974                                                                                         | 0.861  | 0.0635       | <b>0.0159</b>                             | <b>0.0344</b> | <b>0.0152</b>  | <b>0.0413</b> | 0.532  | 0.528                                     | 0.72  | 0.717 | 0.997 | 0.205 |
| 19 | rs8050136  | 52373776         | CA                   | 0.438 | 0.917                                                                                         | 0.872  | 0.105        | 0.0793                                    | 0.115         | <b>0.0424</b>  | 0.23          | 0.73   | 0.978                                     | 0.988 | 0.98  | 1     | 0.939 |
| 20 | rs9935401  | 52374339         | GA                   | 0.438 | 0.989                                                                                         | 0.992  | 0.0629       | <b>0.0314</b>                             | 0.0531        | 0.0535         | 0.0748        | 0.602  | 0.832                                     | 0.874 | 0.858 | 1     | 0.282 |
| 21 | rs3751812  | 52375961         | GT                   | 0.436 | 0.994                                                                                         | 0.96   | 0.127        | <b>0.0475</b>                             | <b>0.0477</b> | <b>0.0332</b>  | 0.0965        | 0.501  | 0.731                                     | 0.901 | 0.832 | 1     | 0.234 |
| 22 | rs9939609  | 52378028         | TA                   | 0.432 | 0.975                                                                                         | 0.75   | 0.0644       | <b>0.0305</b>                             | 0.0947        | <b>0.0261</b>  | 0.0683        | 0.677  | 0.642                                     | 0.749 | 0.694 | 0.999 | 0.581 |
| 23 | rs7190492  | 52386253         | GA                   | 0.328 | 0.962                                                                                         | 0.284  | 0.196        | 0.0842                                    | 0.156         | <b>0.0153</b>  | 0.178         | 0.0874 | 0.741                                     | 0.762 | 0.995 | 1     | 1     |
| 24 | rs9930501  | 52387953         | AG                   | 0.470 | 1                                                                                             | 0.885  | 0.103        | 0.176                                     | 0.305         | 0.115          | 0.223         | 0.467  | 0.993                                     | 0.938 | 0.865 | 1     | 0.339 |
| 25 | rs17218700 | 52402080         | GA                   | 0.144 | 1                                                                                             | 1      | 1            | 0.981                                     | 0.974         | 0.961          | 0.963         | 0.936  | 1                                         | 1     | 1     | 1     | 0.995 |
| 26 | rs11642841 | 52402988         | CA                   | 0.473 | 1                                                                                             | 0.245  | 0.689        | 0.498                                     | 0.854         | 0.134          | 0.645         | 0.925  | 1                                         | 1     | 1     | 1     | 0.978 |
| 27 | rs1861867  | 52406062         | CT                   | 0.350 | 1                                                                                             | 0.536  | 0.29         | 0.0878                                    | 0.1           | <b>0.0226</b>  | 0.0752        | 0.173  | 0.999                                     | 0.956 | 0.997 | 1     | 0.996 |
| 28 | rs11075994 | 52407580         | GA                   | 0.295 | 0.78                                                                                          | 0.299  | 1            | 0.998                                     | 0.976         | 0.285          | 0.679         | 0.62   | 0.892                                     | 0.969 | 0.974 | 1     | 0.936 |
| 29 | rs1421090  | 52407671         | TC                   | 0.228 | 0.994                                                                                         | 0.892  | 1            | 1                                         | 1             | 0.993          | 1             | 1      | 0.934                                     | 1     | 0.815 | 1     | 1     |

\* Significant empirical *P* values (<0.05) were shown in bold font.

‡ Chromosome positions of the SNPs are based on Human Reference Genome Sequence Build 36.

§ The alleles are shown as major allele/minor allele
